# Supplementary material
Source: PubMed Central journal article supplement (PMC5562285)

Figure S1

**A** Liver donor quantitative traits

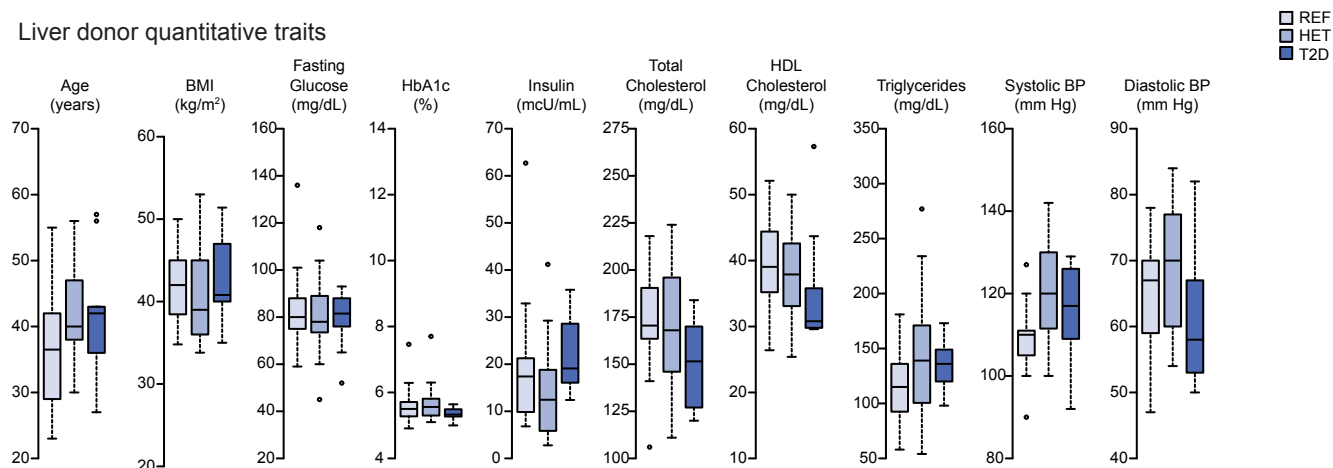

**B** Liver eQTL - all individuals

**C** Liver eQTL - excluding individuals on medication

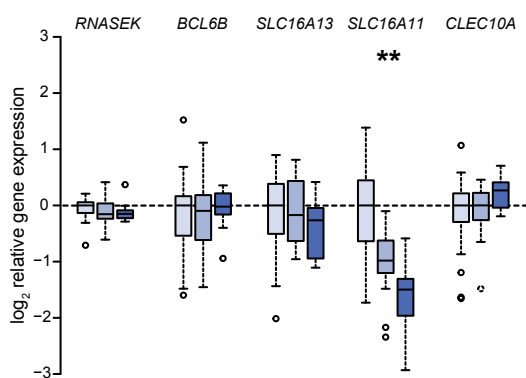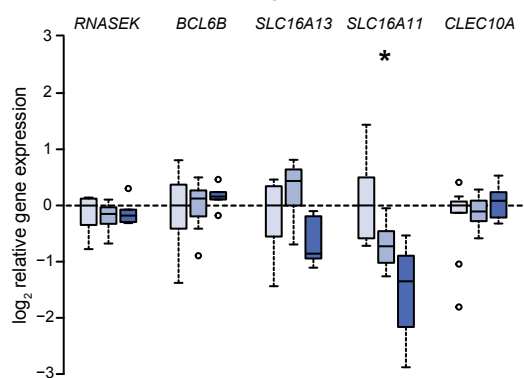

**D** Visceral adipose donor quantitative traits

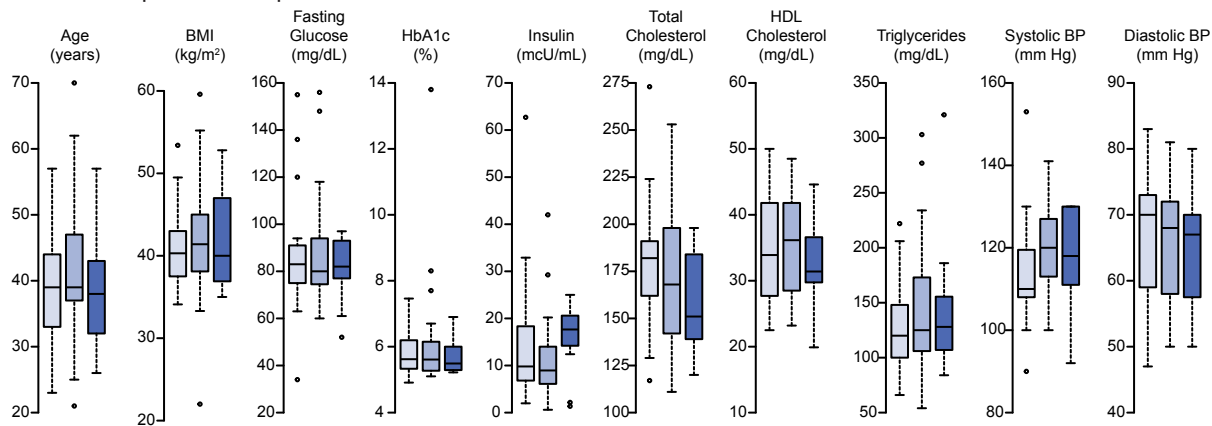

**E** Visceral Adipose eQTL - all individuals

**F** Visceral Adipose eQTL - excluding individuals on medication

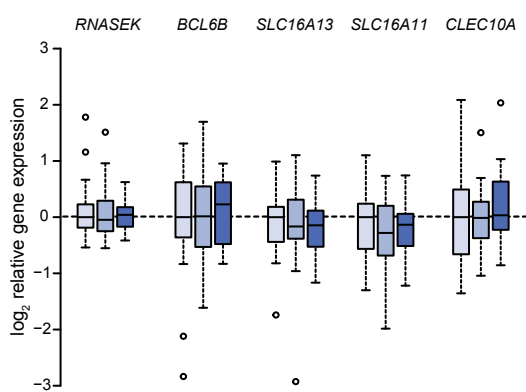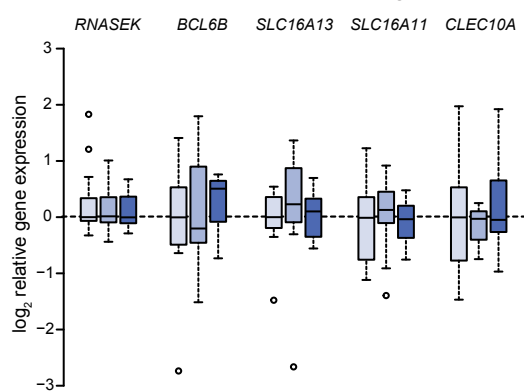

Supplement: NIHMS886770-supplement-1.pdf [file NIHMS886770-supplement-1.pdf]
