# Supplementary material
Source: PubMed Central journal article supplement (PMC5562285)
Supplement: NIHMS886770-supplement-12.pdf [file NIHMS886770-supplement-12.pdf]

**Table S5. Primary human hepatocytes used in this study, Related to STAR Methods.**

| <u>donor number</u> | <u>BioreclamationIVT lot ID</u> | <u>heterozygous genotype</u> |
|---------------------|---------------------------------|------------------------------|
| d1                  | ACB                             | T2D risk haplotype           |
| d2                  | BEB                             | T2D risk haplotype           |
| d3                  | DSX                             | T2D risk haplotype           |
| d4                  | NQA                             | T2D risk haplotype           |
| d5                  | PAA                             | T2D risk haplotype           |
| d6                  | QSK                             | T2D risk haplotype           |
| d7                  | AIH                             | African haplotype            |
| d8                  | FRY                             | African haplotype            |
| d9                  | GEB                             | African haplotype            |
| d10                 | JLP                             | African haplotype            |
| d11                 | KDD                             | African haplotype            |
| d12                 | NRE                             | African haplotype            |
| d13                 | ZBG                             | African haplotype            |
| d14                 | ZXO                             | African haplotype            |

**Table S6. Probes used for droplet digital PCR expression analyses, Related to STAR Methods.**

| <u>Reagent</u>               | <u>Vendor</u> | <u>catalog ID</u> | <u>Forward primer</u> | <u>Reverse primer</u>   | <u>Probe</u>           | <u>Used in this paper</u>                   |
|------------------------------|---------------|-------------------|-----------------------|-------------------------|------------------------|---------------------------------------------|
| FAM-RNASEK Taqman probe      | Thermo Fisher | Hs00947009_m1     | N/A                   | N/A                     | N/A                    | Figures 2A, S1C, S1E, and S1F               |
| FAM-RNASEK Taqman probe      | Thermo Fisher | Hs00947010_g1     | N/A                   | N/A                     | N/A                    | Figure S1B                                  |
| FAM-BCL6B Taqman probe       | Thermo Fisher | Hs00394655_m1     | N/A                   | N/A                     | N/A                    | Figures 2A, S1C, S1E, and S1F               |
| FAM-BCL6B Taqman probe       | Thermo Fisher | Hs00960914_g1     | N/A                   | N/A                     | N/A                    | Figure S1B                                  |
| FAM-SLC16A13 Taqman probe    | Thermo Fisher | Hs00416832_m1     | N/A                   | N/A                     | N/A                    | Figures 2A, 6A, S1C, S1E, S1F, and S3B      |
| FAM-SLC16A13 Taqman probe    | Thermo Fisher | Hs00914030_m1     | N/A                   | N/A                     | N/A                    | Figure S1B                                  |
| FAM-SLC16A11 Taqman probe    | Thermo Fisher | Hs00601062_g1     | N/A                   | N/A                     | N/A                    | Figures 2A, 6A, S1C, S1E, S1F, and S3B      |
| FAM-SLC16A11 Taqman probe    | Thermo Fisher | Hs01558330_g1     | N/A                   | N/A                     | N/A                    | Figure S1B                                  |
| FAM-CLEC10A Taqman probe     | Thermo Fisher | Hs00924864_g1     | N/A                   | N/A                     | N/A                    | Figures 2A, S1C, S1E, and S1F               |
| FAM-CLEC10A Taqman probe     | Thermo Fisher | Hs00197107_m1     | N/A                   | N/A                     | N/A                    | Figure S1B                                  |
| FAM-SLC16A1 Taqman probe     | Thermo Fisher | Hs01560299_m1     | N/A                   | N/A                     | N/A                    | Figures 6A and S3B                          |
| FAM-SLC16A3 Taqman probe     | Thermo Fisher | Hs00358829_m1     | N/A                   | N/A                     | N/A                    | Figures 6A and S3B                          |
| FAM-SLC16A7 Taqman probe     | Thermo Fisher | Hs00940851_m1     | N/A                   | N/A                     | N/A                    | Figures 6A and S3B                          |
| FAM-SLC16A8 Taqman probe     | Thermo Fisher | Hs00895133_g1     | N/A                   | N/A                     | N/A                    | Figures 6A and S3B                          |
| FAM-BSG Taqman probe         | Thermo Fisher | Hs00936295_m1     | N/A                   | N/A                     | N/A                    | Figures 6A and S3B                          |
| FAM-EMB Taqman probe         | Thermo Fisher | Hs00904660_m1     | N/A                   | N/A                     | N/A                    | Figure S3B                                  |
| VIC-TBP Taqman probe         | Thermo Fisher | Hs00427620_m1     | N/A                   | N/A                     | N/A                    | Figures 2A, 6A, S1B, S1C, S1E, S1F, and S3B |
| HEX-SLC16A11-REF-rs13342692  | Biorad        | N/A               | 5'-AGGCAGCCAGCCC-3'   | 5'-CCGAGGTAGAGATGCAG-3' | 5'-TTTCGCCAGCGATCTG-3' | Figures 2B-D, S2A-B                         |
| FAM-SLC16A11-RISK-rs13342692 | Biorad        | N/A               | 5'-AGGCAGCCAGCCC-3'   | 5'-CCGAGGTAGAGATGCAG-3' | 5'-TCGCCAGCGGTCTG-3'   | Figures 2B-D, S2A-B                         |
